# Supplementary material
Source: PubMed Central journal article supplement (PMC5992005)
Supplement: NIHMS931825-supplement-Supp_TableS1-4.pdf [file NIHMS931825-supplement-Supp_TableS1-4.pdf]

**SUPPLEMENTAL TABLE 1**

| <b>Gene</b> | <b>Type</b>              | <b>Gene</b> | <b>Type</b>         | <b>Gene</b>  | <b>Type</b>            |
|-------------|--------------------------|-------------|---------------------|--------------|------------------------|
| B3GAT1      | NK/Tfh                   | FCGR3A      | Fc Receptor         | MYBL1        | NK                     |
| BCL2        | Apoptosis                | FGFBP2      | NK                  | PALMD        | Endothelium            |
| BCL6        | Tfh/B                    | FOXP3       | Treg                | PDCD1        | PD-1 CD279, Checkpoint |
| CAV1        | Endothelium              | GATA3       | TH2                 | PECAM1       | Endothelium            |
| CCL5        | T Cell Chemokine         | GNLY        | NK/CTL              | PLA1A        | Endothelium            |
| CCR4        | Chemokine Receptor       | GZMB        | NK/CTL              | PLAT         | Endothelium            |
| CCR5        | Chemokine Receptor       | ICOS        | TH2                 | PSMB10       | IFNG Inducible         |
| CD34        | Endothelium              | IFNA1       | Cytokine            | RHOJ         | Endothelium            |
| CD3D        | T Cells                  | IFNG        | Cytokine            | ROBO4        | Endothelium            |
| CD4         | T Cell Subset            | IL10        | M TH2 Treg B        | RORyt (RORC) | Th17                   |
| CD68        | Macrophage               | IL17        | Cytokine            | RPS6         | mTOR pathway           |
| CD69        | T NK Cells               | IL1RL1      | TH2, Receptor IL-33 | RPS6KB1      | mTOR pathway           |
| CD74        | Endothelium              | IL2         | Cytokine            | SELE         | Endothelium            |
| CD8A        | T Cell Subset, NK        | IL21        | Cytokine            | SH2D1B       | NK                     |
| CDH13       | Endothelium              | IL4         | Cytokine            | SOX7         | Endothelium            |
| CDH5        | Endothelium              | IL6R        | Cytokine Receptor   | TBX21        | T-Bet IFNG Inducible   |
| CLEC4C      | DC                       | ITGAX       | CD11c               | TEK          | Endothelium            |
| CX3CR1      | Chemokine Receptor       | KLF4        | Endothelium         | TGFB1        | Cytokine               |
| CXCL11      | IFNG Inducible Chemokine | KLRB1       | NK                  | THBD         | Endothelium            |
| DARC        | Endothelium              | KLRF1       | NK                  | TNF          | Cytokine               |
| EPO         | Metabolic                | MALL        | Endothelium         | TNFRSF18     | GITR, Checkpoint       |
| FAS         | Apoptosis                | MS4A1       | CD20 B Cells        | TRIB1        | Inflammation           |
|             |                          |             |                     | VWF          | Endothelium            |

**SUPPLEMENTARY TABLE 2**

| <b>GROUP</b>                               |                     |                | <b>VALUE</b> |
|--------------------------------------------|---------------------|----------------|--------------|
| <b>CHRONIC ANTIBODY MEDIATED REJECTION</b> | <b>N</b>            |                | <b>42</b>    |
|                                            | <b>DAYS POST TX</b> | <b>Minimum</b> | <b>98</b>    |
|                                            | <b>DAYS POST TX</b> | <b>Maximum</b> | <b>1951</b>  |
|                                            | <b>DAYS POST TX</b> | <b>Median</b>  | <b>651.5</b> |
|                                            | <b>Cr</b>           | <b>Minimum</b> | <b>0.9</b>   |
|                                            | <b>Cr</b>           | <b>Maximum</b> | <b>4.6</b>   |
| <b>MIXED</b>                               | <b>Cr</b>           | <b>Median</b>  | <b>2.5</b>   |
|                                            | <b>N</b>            |                | <b>86</b>    |
|                                            | <b>DAYS POST TX</b> | <b>Minimum</b> | <b>71</b>    |
|                                            | <b>DAYS POST TX</b> | <b>Maximum</b> | <b>2498</b>  |
|                                            | <b>DAYS POST TX</b> | <b>Median</b>  | <b>358</b>   |
|                                            | <b>Cr</b>           | <b>Minimum</b> | <b>1</b>     |
| <b>NO PATHOLOGICAL REJECTION</b>           | <b>Cr</b>           | <b>Maximum</b> | <b>28</b>    |
|                                            | <b>Cr</b>           | <b>Median</b>  | <b>3.1</b>   |
|                                            | <b>N</b>            |                | <b>55</b>    |
|                                            | <b>DAYS POST TX</b> | <b>Minimum</b> | <b>8</b>     |
|                                            | <b>DAYS POST TX</b> | <b>Maximum</b> | <b>5983</b>  |
|                                            | <b>DAYS POST TX</b> | <b>Median</b>  | <b>385</b>   |
| <b>NORMAL</b>                              | <b>Cr</b>           | <b>Minimum</b> | <b>0.7</b>   |
|                                            | <b>Cr</b>           | <b>Maximum</b> | <b>1.6</b>   |
|                                            | <b>Cr</b>           | <b>Median</b>  | <b>1.3</b>   |
|                                            | <b>N</b>            | <b>N</b>       | <b>18</b>    |
|                                            | <b>DAYS POST TX</b> | <b>Minimum</b> | <b>1</b>     |
|                                            | <b>DAYS POST TX</b> | <b>Maximum</b> | <b>16</b>    |
| <b>ACUTE CELLULAR REJECTION</b>            | <b>DAYS POST TX</b> | <b>Median</b>  | <b>1</b>     |
|                                            | <b>Cr</b>           | <b>Minimum</b> | <b>0.6</b>   |
|                                            | <b>Cr</b>           | <b>Maximum</b> | <b>1.5</b>   |
|                                            | <b>Cr</b>           | <b>Median</b>  | <b>1</b>     |
|                                            | <b>N</b>            | <b>N</b>       | <b>77</b>    |
|                                            | <b>DAYS POST TX</b> | <b>Minimum</b> | <b>23</b>    |
| <b>DAYS POST TX</b>                        | <b>Maximum</b>      | <b>4327</b>    |              |
| <b>DAYS POST TX</b>                        | <b>Median</b>       | <b>156</b>     |              |
| <b>Cr</b>                                  | <b>Minimum</b>      | <b>0.6</b>     |              |
| <b>Cr</b>                                  | <b>Maximum</b>      | <b>14</b>      |              |
| <b>Cr</b>                                  | <b>Median</b>       | <b>1.4</b>     |              |

SUPPLEMENTARY TABLE 3

| GENE   | TERM | SE    | Prob> t | FDRPV    | GENE   | TERM | SE    | Prob> t | FDRPV    | GENE   | TERM | SE    | Prob> t | FDRPV    |
|--------|------|-------|---------|----------|--------|------|-------|---------|----------|--------|------|-------|---------|----------|
| VWF    | C4d  | 0.306 | 5.0E-20 | 6.98E-14 | VWF    | DSA  | 0.238 | 6.0E-14 | 9.01E-13 | VWF    | CG   | 0.365 | 1.4E-22 | 1.07E-29 |
| CAV1   | C4d  | 0.179 | 1.8E-11 | 4.08E-10 | CAV1   | DSA  | 0.161 | 3.4E-11 | 2.67E-09 | CAV1   | CG   | 0.202 | 1.1E-11 | 6.73E-10 |
| DARC   | C4d  | 0.177 | 3.5E-08 | 7.83E-07 | DARC   | DSA  | 0.140 | 1.3E-06 | 1.34E-06 | DARC   | CG   | 0.193 | 7.9E-08 | 6.57E-10 |
| SOX7   | C4d  | 0.130 | 1.3E-04 | 9.74E-04 | IL1RL1 | DSA  | 0.135 | 2.5E-04 | 4.47E-04 | SOX7   | CG   | 0.159 | 2.5E-05 | 6.78E-06 |
| IL1RL1 | C4d  | 0.103 | 1.1E-02 | 1.25E-02 | ITGAX  | DSA  | 0.114 | 6.4E-03 | 3.40E-02 | IL1RL1 | CG   | 0.150 | 8.0E-04 | 5.34E-05 |
|        |      |       |         |          |        |      |       |         |          | PECAM  | CG   | 0.139 | 2.4E-05 | 1.08E-06 |
|        |      |       |         |          |        |      |       |         |          | ROBO4  | CG   | 0.101 | 9.1E-05 | 2.60E-04 |
| GENE   | TERM | SE    | Prob> t | FDRPV    | GENE   | TERM | SE    | Prob> t | FDRPV    | GENE   | TERM | SE    | Prob> t | FDRPV    |
| VWF    | PTC  | 0.189 | 1.7E-10 | 3.04E-09 | VWF    | G    | 0.240 | 3.1E-14 | 4.35E-14 | IL1RL1 | V    | 0.270 | 3.4E-11 | 2.63E-10 |
| IL1RL1 | PTC  | 0.162 | 9.1E-07 | 1.34E-04 | DARC   | G    | 0.135 | 3.6E-06 | 1.14E-05 | GZMB   | V    | 0.216 | 1.1E-05 | 1.24E-09 |
| DARC   | PTC  | 0.141 | 1.8E-07 | 6.72E-07 | CAV1   | G    | 0.121 | 8.2E-07 | 1.14E-05 | CXCL11 | V    | 0.184 | 3.5E-04 | 1.24E-05 |
| GZMB   | PTC  | 0.130 | 4.7E-04 | 2.33E-04 | IL1RL1 | G    | 0.100 | 5.7E-03 | 9.07E-03 | CCL5   | V    | 0.160 | 1.2E-04 | 6.54E-06 |
| CAV1   | PTC  | 0.125 | 3.2E-08 | 6.07E-08 |        |      |       |         |          | CD3D   | V    | 0.158 | 5.7E-04 | 7.44E-05 |
| CCL5   | PTC  | 0.121 | 1.2E-04 | 1.68E-03 |        |      |       |         |          | ITGAX  | V    | 0.151 | 2.2E-03 | 1.39E-04 |
| FCGR3A | PTC  | 0.119 | 3.5E-04 | 2.12E-03 |        |      |       |         |          | FCGR3A | V    | 0.149 | 6.4E-04 | 1.39E-04 |
| CD68   | PTC  | 0.119 | 4.0E-07 | 1.08E-05 |        |      |       |         |          | CD68   | V    | 0.146 | 9.6E-07 | 1.24E-09 |
| ITGAX  | PTC  | 0.113 | 2.1E-03 | 7.04E-03 |        |      |       |         |          | GNLY   | V    | 0.140 | 2.4E-04 | 3.28E-05 |
| CD4    | PTC  | 0.106 | 3.8E-05 | 1.68E-03 |        |      |       |         |          | PDCD1  | V    | 0.139 | 4.4E-03 | 9.91E-04 |
|        |      |       |         |          |        |      |       |         |          | ICOS   | V    | 0.130 | 3.9E-03 | 6.00E-03 |
|        |      |       |         |          |        |      |       |         |          | IFNG   | V    | 0.126 | 5.4E-03 | 5.12E-03 |
|        |      |       |         |          |        |      |       |         |          | CD8A   | V    | 0.121 | 3.0E-03 | 9.66E-03 |
|        |      |       |         |          |        |      |       |         |          | CD4    | V    | 0.115 | 5.0E-04 | 8.29E-04 |
|        |      |       |         |          |        |      |       |         |          | CD69   | V    | 0.112 | 4.0E-03 | 6.66E-04 |

SUPPLEMENTARY TABLE 4

| GENE     | TERM | SE    | Prob> t | FDRPV    | GENE     | TERM | SE    | Prob> t | FDRPV    | GENE     | TERM | SE    | Prob> t | FDRPV    |
|----------|------|-------|---------|----------|----------|------|-------|---------|----------|----------|------|-------|---------|----------|
| PDCD1    | I    | 0.302 | 8.4E-20 | 1.01E-21 | PDCD1    | T    | 0.287 | 2.4E-17 | 2.07E-17 | PDCD1    | TI   | 0.276 | 1.4E-15 | 1.22E-15 |
| CXCL11   | I    | 0.288 | 1.8E-15 | 2.43E-15 | CD3D     | T    | 0.285 | 5.8E-18 | 9.47E-17 | CXCL11   | TI   | 0.255 | 7.9E-12 | 3.13E-09 |
| CD3D     | I    | 0.268 | 1.5E-16 | 8.98E-19 | CXCL11   | T    | 0.276 | 1.3E-13 | 3.26E-12 | CD3D     | TI   | 0.253 | 8.1E-14 | 8.80E-13 |
| ITGAX    | I    | 0.244 | 1.8E-12 | 1.15E-13 | ITGAX    | T    | 0.266 | 8.6E-14 | 7.89E-12 | GZMB     | TI   | 0.243 | 4.1E-11 | 8.80E-13 |
| IL1RL1   | I    | 0.242 | 7.9E-15 | 9.85E-16 | GZMB     | T    | 0.249 | 6.7E-12 | 1.52E-11 | IL1RL1   | TI   | 0.235 | 1.3E-12 | 1.58E-14 |
| GZMB     | I    | 0.241 | 6.8E-12 | 1.28E-16 | CCL5     | T    | 0.225 | 3.3E-14 | 5.85E-12 | ITGAX    | TI   | 0.224 | 5.0E-10 | 4.73E-09 |
| ICOS     | I    | 0.238 | 2.4E-13 | 2.12E-13 | ICOS     | T    | 0.220 | 4.0E-11 | 4.55E-11 | CCL5     | TI   | 0.211 | 3.1E-12 | 2.98E-10 |
| CCL5     | I    | 0.236 | 1.1E-15 | 1.64E-16 | MS4A1    | T    | 0.209 | 3.4E-08 | 2.47E-07 | CD8A     | TI   | 0.197 | 6.8E-11 | 4.36E-10 |
| CD8A     | I    | 0.225 | 9.3E-15 | 8.28E-15 | CD8A     | T    | 0.209 | 1.4E-12 | 1.21E-10 | ICOS     | TI   | 0.193 | 1.4E-08 | 1.28E-08 |
| MS4A1    | I    | 0.210 | 2.6E-08 | 3.71E-08 | TNFRSF18 | T    | 0.198 | 3.2E-10 | 9.41E-11 | MS4A1    | TI   | 0.179 | 7.2E-06 | 4.36E-05 |
| TNFRSF18 | I    | 0.206 | 3.0E-11 | 3.64E-12 | IL1RL1   | T    | 0.193 | 1.9E-09 | 7.12E-09 | CD68     | TI   | 0.179 | 3.5E-15 | 5.91E-13 |
| IFNG     | I    | 0.200 | 4.7E-09 | 3.71E-08 | PSMB10   | T    | 0.188 | 4.8E-20 | 1.09E-20 | TNFRSF18 | TI   | 0.177 | 5.9E-08 | 2.61E-08 |
| CD68     | I    | 0.185 | 7.3E-18 | 6.85E-19 | CD69     | T    | 0.186 | 7.9E-11 | 4.62E-11 | IFNG     | TI   | 0.173 | 1.8E-06 | 1.27E-05 |
| PSMB10   | I    | 0.178 | 9.0E-19 | 1.40E-20 | GNLY     | T    | 0.170 | 8.6E-10 | 1.45E-07 | GNLY     | TI   | 0.169 | 4.9E-09 | 1.46E-06 |
| FCGR3A   | I    | 0.175 | 9.6E-08 | 5.00E-07 | FCGR3A   | T    | 0.161 | 1.3E-06 | 2.06E-05 | FCGR3A   | TI   | 0.163 | 2.0E-06 | 4.98E-05 |
| GNLY     | I    | 0.174 | 3.0E-10 | 6.20E-09 | IFNG     | T    | 0.157 | 6.5E-06 | 3.40E-05 | PSMB10   | TI   | 0.161 | 8.0E-15 | 9.19E-15 |
| CD69     | I    | 0.161 | 9.2E-09 | 1.86E-11 | CD68     | T    | 0.157 | 1.4E-12 | 6.83E-10 | CD69     | TI   | 0.161 | 5.1E-08 | 9.75E-09 |
| CCR5     | I    | 0.148 | 1.8E-09 | 1.22E-09 | TBX21    | T    | 0.139 | 2.8E-08 | 4.01E-07 | TBX21    | TI   | 0.132 | 3.4E-07 | 4.77E-06 |
| TBX21    | I    | 0.143 | 7.9E-09 | 2.12E-08 | FOXP3    | T    | 0.133 | 5.1E-06 | 3.11E-07 | CD4      | TI   | 0.128 | 8.8E-07 | 4.56E-06 |
| CD4      | I    | 0.131 | 1.2E-07 | 3.97E-08 | TGFB1    | T    | 0.132 | 3.1E-05 | 3.74E-05 | CCR5     | TI   | 0.125 | 1.6E-06 | 4.56E-06 |
| CD74     | I    | 0.125 | 6.9E-09 | 1.43E-09 | CCR4     | T    | 0.131 | 9.0E-06 | 2.67E-05 | DARC     | TI   | 0.122 | 2.5E-05 | 4.98E-05 |
